# Supplementary material for: Exploring dimension-reduced embeddings with Sleepwalk
Source: HighWire-hosted journal article supplement (doi:10.1101/gr.251447.119), 2020-05-01
Supplement: Supplemental_Figure_S1.docx [file Supplemental_Figure_S1.docx]

**Supplemental Figure S1**


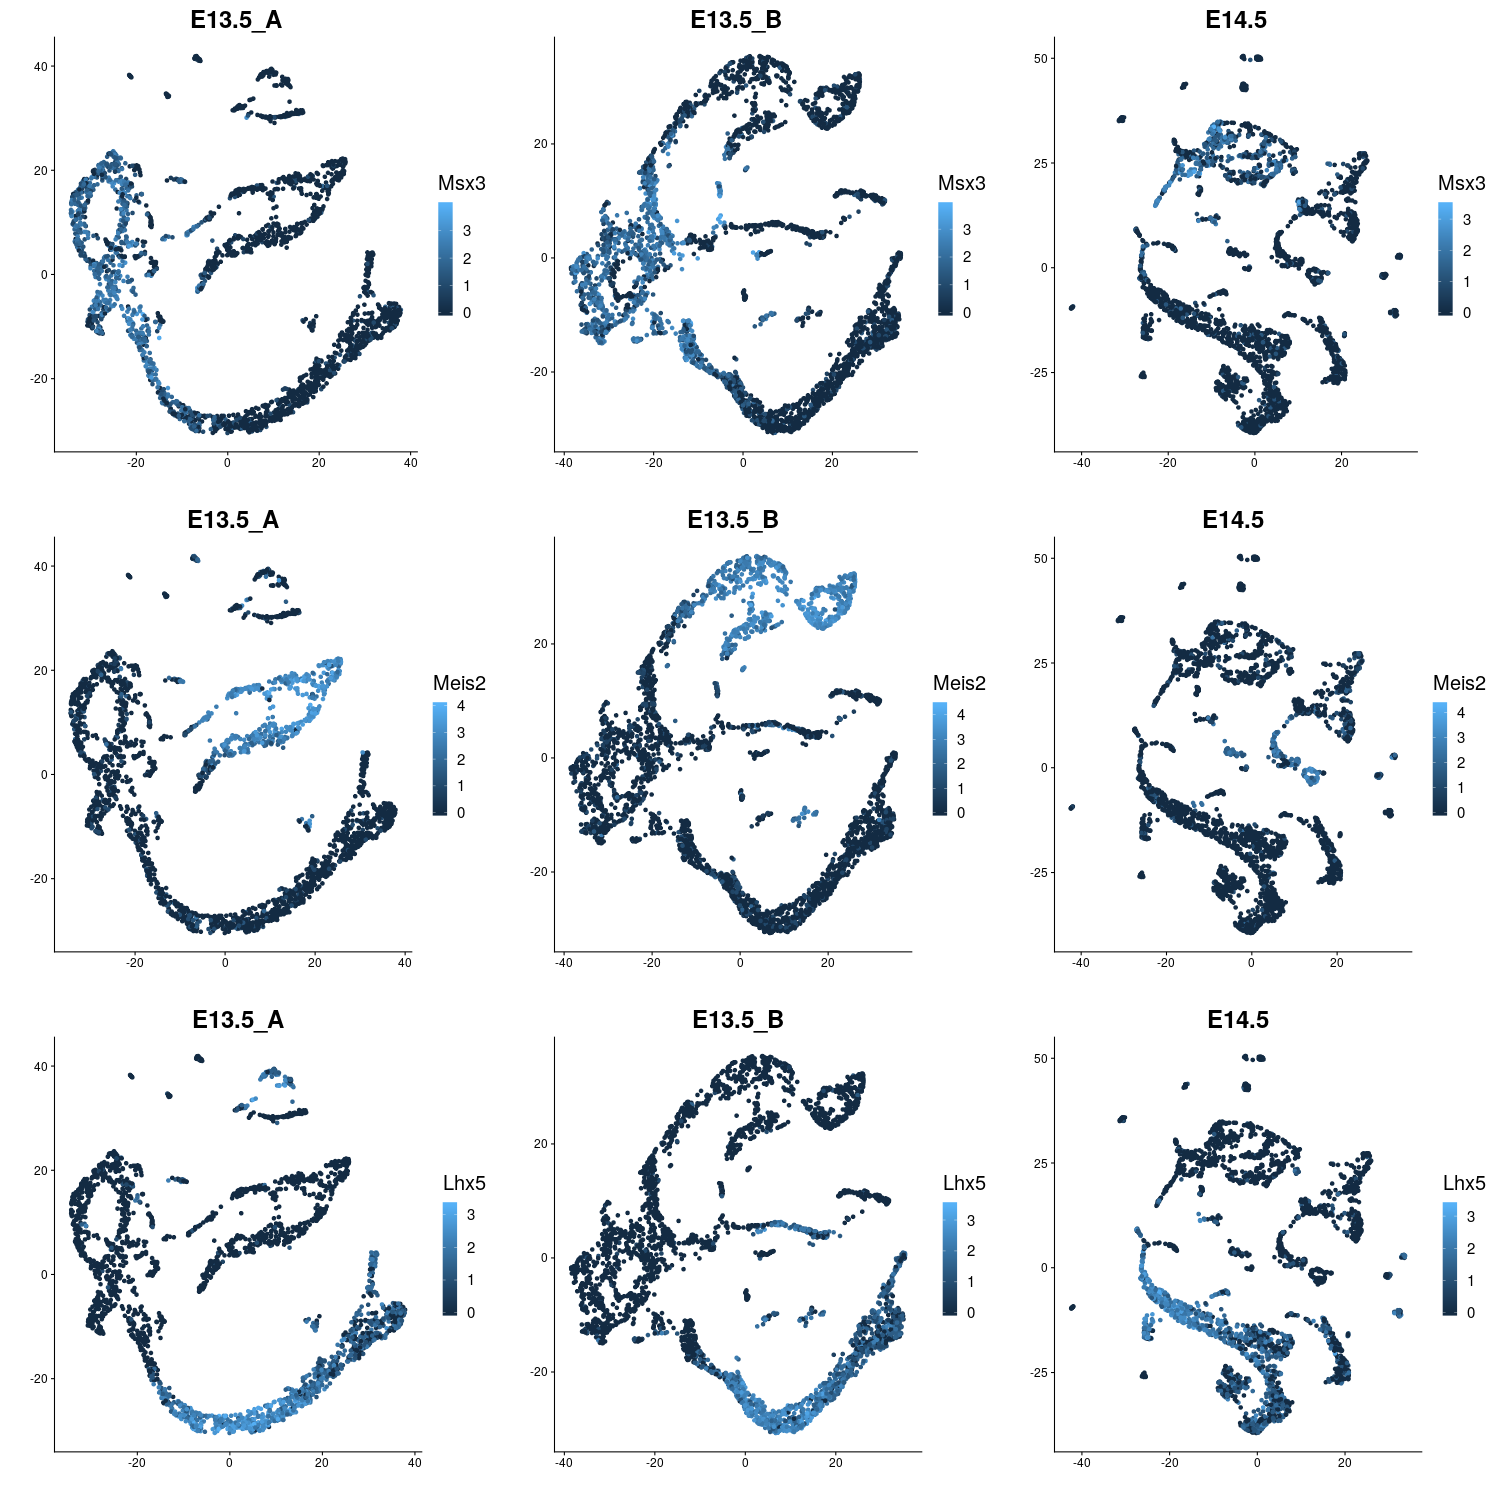


**Supplemental Figure S1. Markers used to identify lineages in developing murine cerebellum.** Expression of three marker genes was used to identify GABAergic (*Lhx5*, bottom row) and glutamatergic (*Meis*2, middle row) lineages as well as early progenitor cells (*Msx3*, top row).
